# Supplementary material for: Strong Light Absorption Induced by Aged Biomass Burning BlackCarbon over the Southeastern Tibetan Plateau in Pre-monsoonSeason
Source: Copernicus journal article supplement (doi:10.5194/acp-2020-1150), 2020-12-02
Supplement: Supplementary file 1 [file acp-2020-1150-supplement.pdf]

# Strong Light Absorption Induced by Aged Biomass Burning Black Carbon over the Southeastern Tibetan Plateau in Pre-monsoon Season

Tianyi Tan<sup>1</sup>, Min Hu<sup>1</sup>, Zhuofei Du<sup>1</sup>, Gang Zhao<sup>1</sup>, Dongjie Shang<sup>1</sup>, Jing Zheng<sup>1</sup>, Yanhong Qin<sup>1</sup>, Mengren Li<sup>1</sup>, Yusheng Wu<sup>1</sup>, Limin Zeng<sup>1</sup>, Song Guo<sup>1</sup>, Zhijun Wu<sup>1</sup>

<sup>1</sup>State Key Joint Laboratory of Environmental Simulation and Pollution Control, International Joint Laboratory for Regional Pollution Control, Ministry of Education (IJRC), College of Environmental Sciences and Engineering, Peking University, Beijing, 100871, China

Correspondence to: Min Hu (minhu@pku.edu.cn)

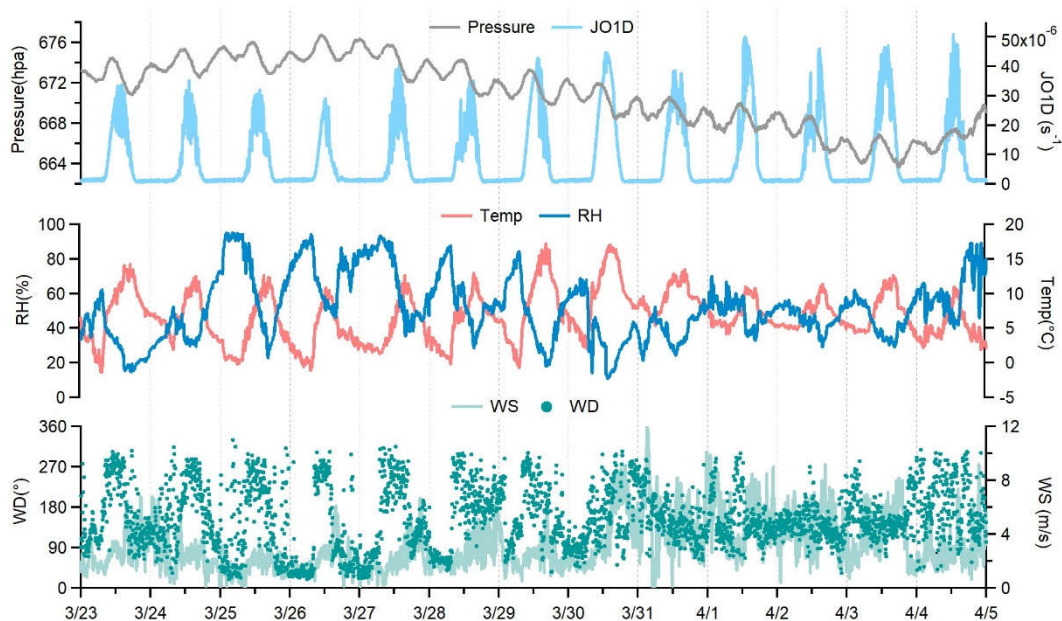

10

Figure S1. Meteorological conditions during the campaign.

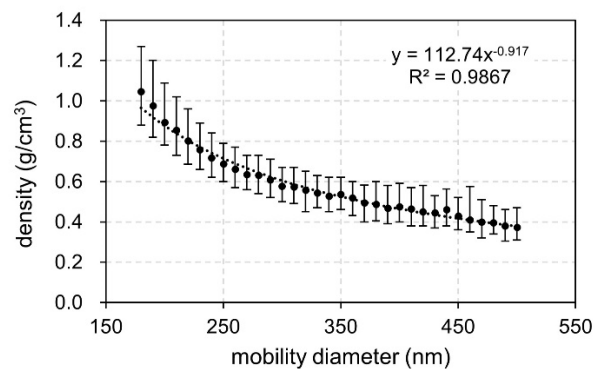

**Figure S2.** Size-dependently effective density of the BC core for thinly-coated BC particles.

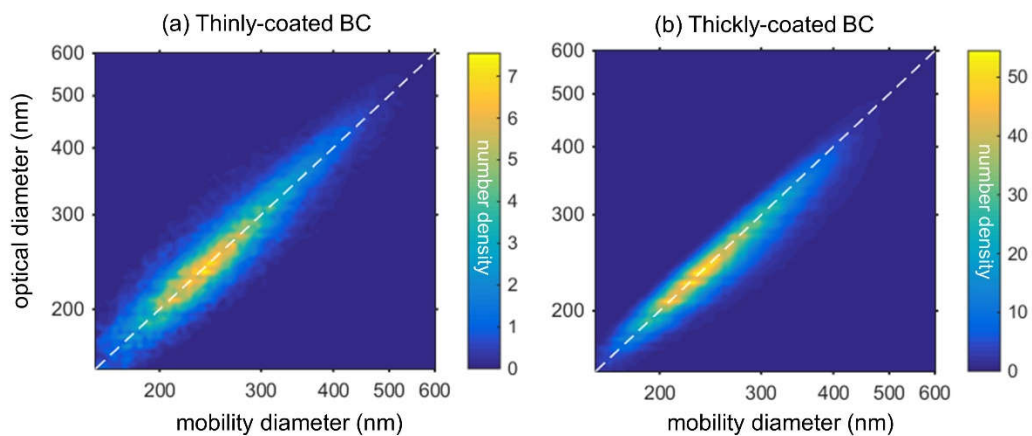

15 **Figure S3.** Comparison between optical diameter and mobility diameter for (a) thinly-coated BC and (b) thickly-coated BC.

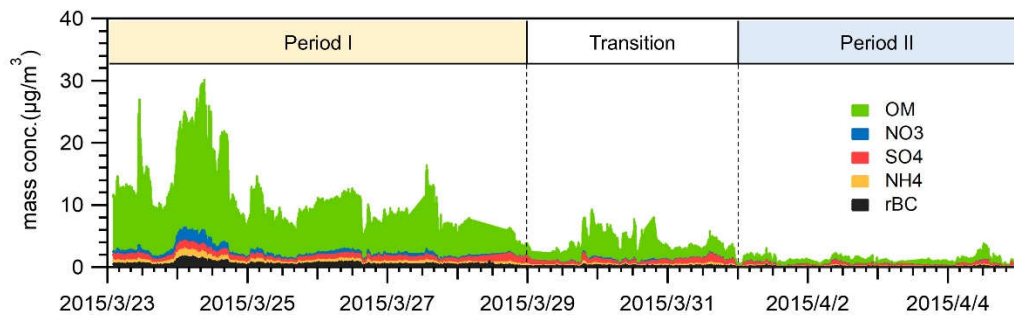

**Figure S4.** Time series of the aerosol mass concentrations of different chemical species.
